# Supplementary material for: Electrospun continuous nanofibers based on a TiO2–ZnO–graphene composite
Source: Royal Society of Chemistry journal article supplement (doi:10.1039/c3ra44574g), 2013-01-01
Supplement: c3ra44574g.pdf [file c3ra44574g.pdf]

## Electronic Supplementary Information (ESI)

### Electrospun continuous nanofibers based on TiO<sub>2</sub>-ZnO-Graphene composite<sup>†</sup>

**Asha Anish Madhavan<sup>1</sup>, Annapoorna Mohandas<sup>1</sup>, Antonio Licciulli<sup>2</sup>, Sanosh K.P<sup>2</sup>, P. Praveen<sup>1</sup>, R. Jayakumar<sup>1</sup>, Shantikumar V. Nair<sup>1</sup>, A. Sreekumaran Nair<sup>1#</sup>, Avinash Balakrishnan<sup>1\*</sup>**

<sup>1</sup>Amrita Centre for Nanoscience & Molecular Medicine, Amrita Institute of Medical Science, AIMS Ponekkara PO, Kochi 682041, Kerala, India

<sup>2</sup>Department of Innovation Engineering, Università di Lecce, Via per Arnesano, 73100 Lecce, Italy

Email: avinash.balakrishnan@gmail.com, sreekumarannair@aims.amrita.edu

## ESI I

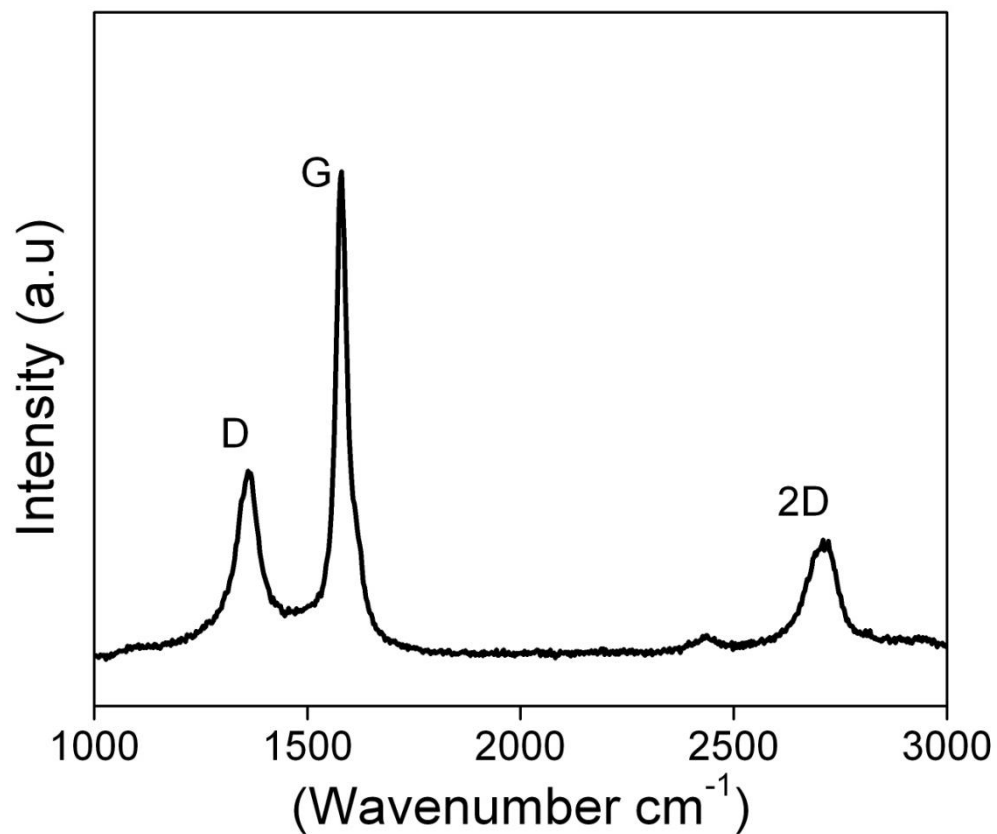

Fig. ESI-I. Raman analysis of graphene

## ESI II

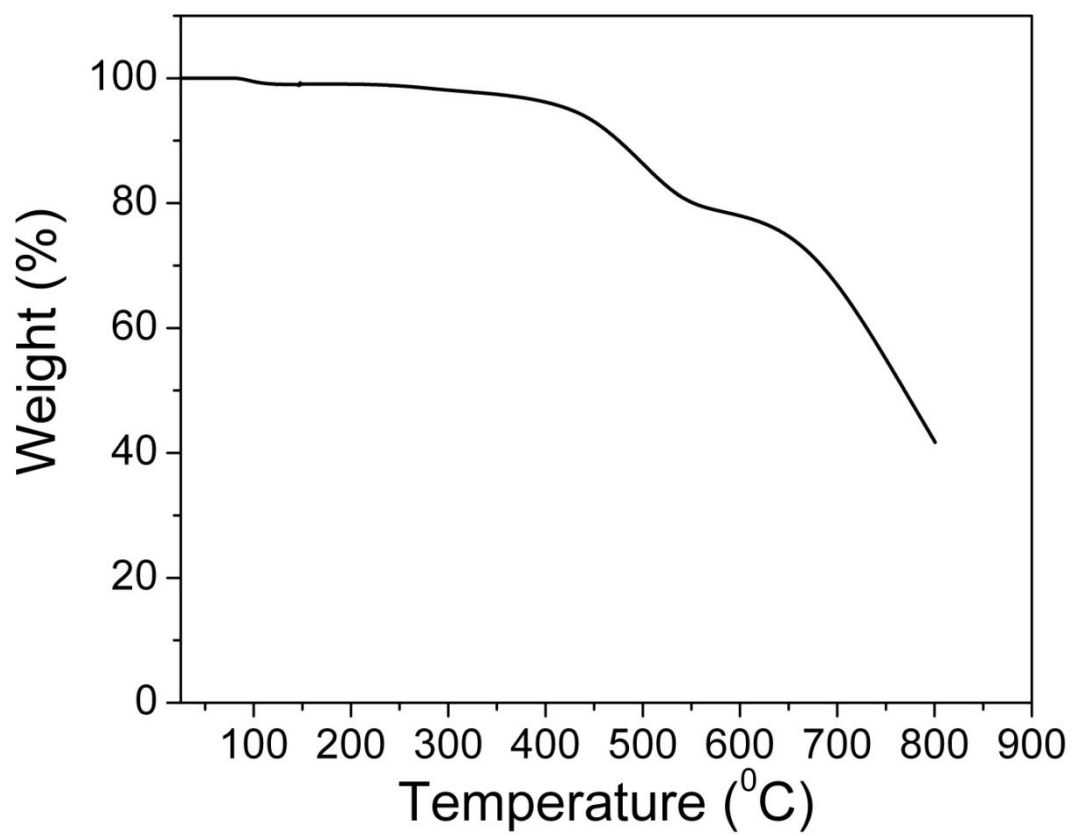

Fig. ESI-II. TGA analysis of graphene

### ESI-III

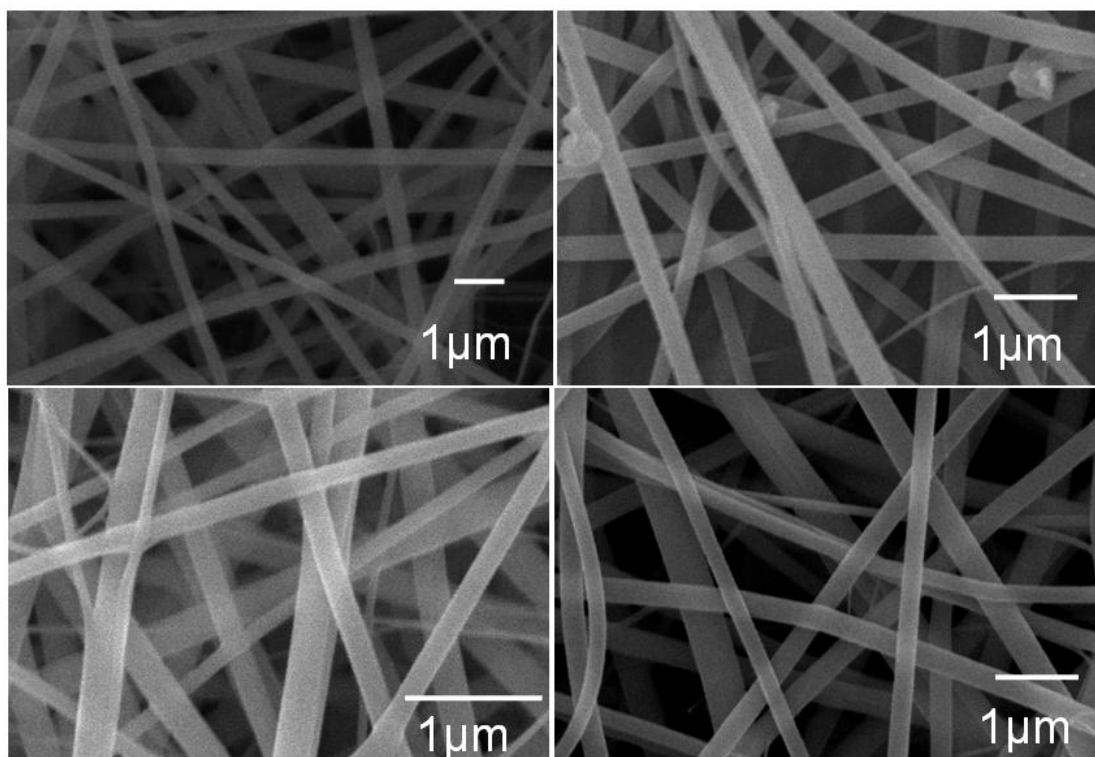

Fig. ESI-III. SEM images of annealed electrospun fibers (a) TZ, (b) TZG-0.2, (c) TZG-0.5 and (d) TZG-0.7.

## ESI-IV

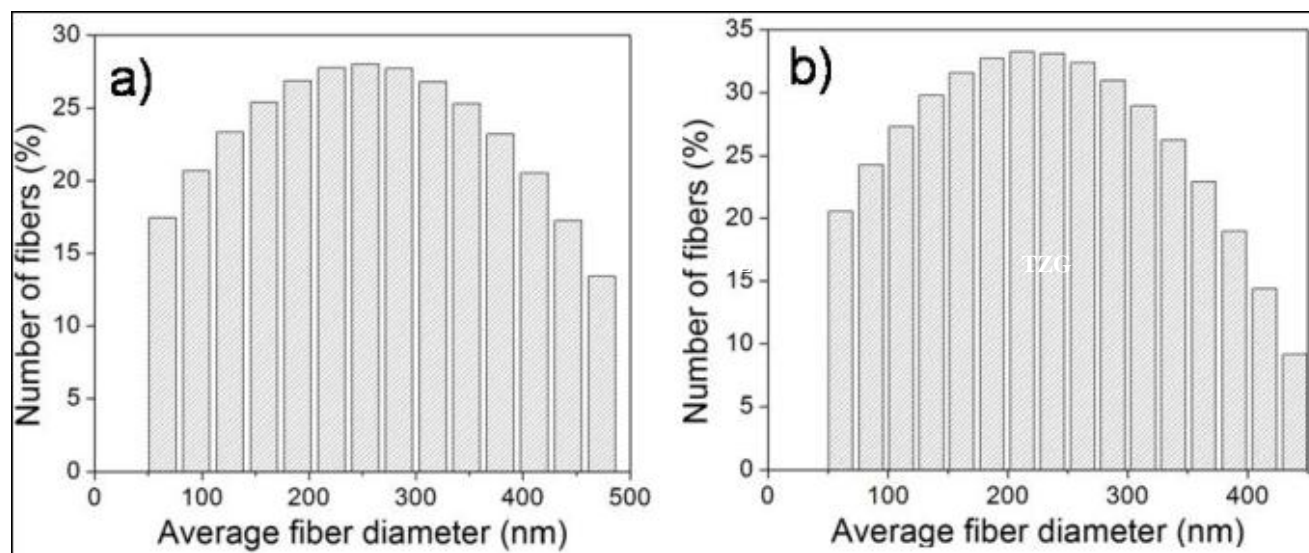

Fig. ESI-IV. Plot of fiber diameter distribution of TZG samples (a) before and (b) after annealing.
